# Supplementary material for: Nanoscaled luminescent terbium metal–organic frameworks for measuring and scavenging reactive oxygen species in living cells
Source: Royal Society of Chemistry journal article supplement (doi:10.1039/c9tb00361d), 2019-01-01
Supplement: c9tb00361d1.pdf [file c9tb00361d1.pdf]

## **Nanoscaled Luminescent Terbium Metal-Organic Frameworks for Measuring and Scavenging Reactive Oxygen Species in Living Cells**

Huaping Li ‡,<sup>a</sup> Xuanyu Cao ‡,<sup>a</sup> Xinyu Fei<sup>a</sup>, Shiming Zhang<sup>\*,b</sup>, Yuezhong Xian<sup>\*,a</sup>

<sup>a</sup>*Shanghai Key Laboratory of Green Chemistry and Chemical Processes, Department of Chemistry, School of Chemistry and Molecular Engineering, East China Normal University, Shanghai 200241, China.*

<sup>b</sup>*Department of Chemical Engineering, Shanghai Jiao Tong University, Shanghai Electrochemical Energy Device Engineering Technology Research Center, Shanghai, 200240, P. R. China*

‡ Huaping Li and Xuanyu Cao contributed equally to this work.

*\*Corresponding authors.*

*E-mail: zhangsm860409@sjtu.edu.cn; E-mail: yzxian@chem.ecnu.edu.cn.*

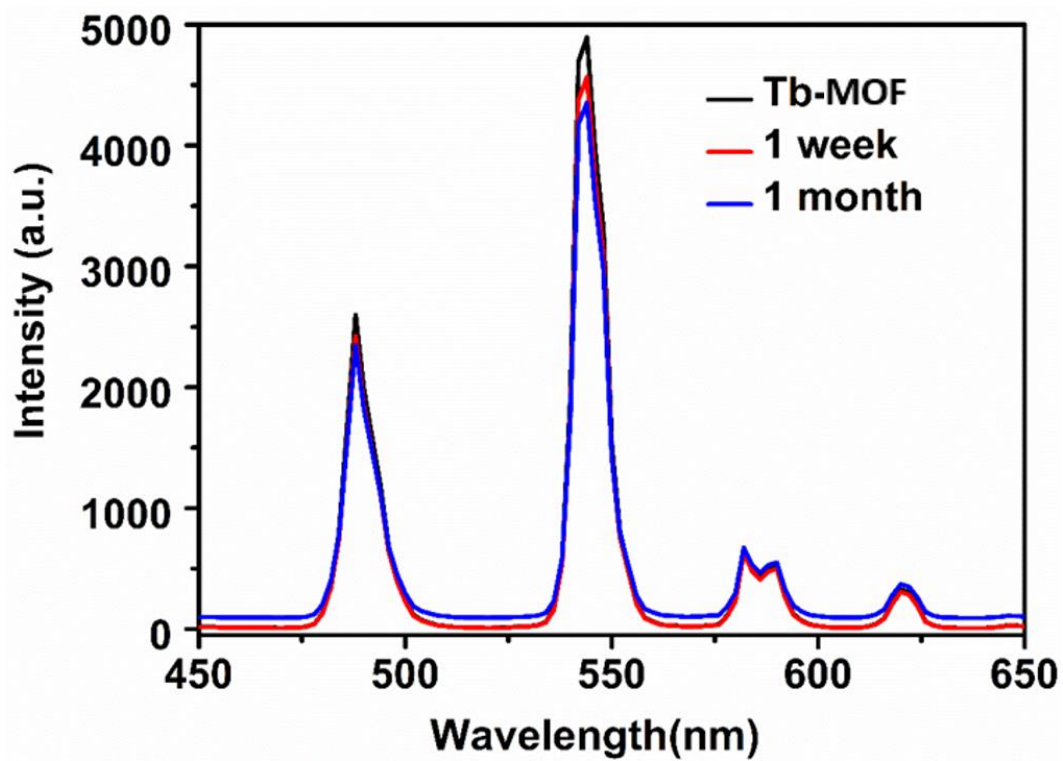

Figure S1. The luminescent stability of Tb-MOF.

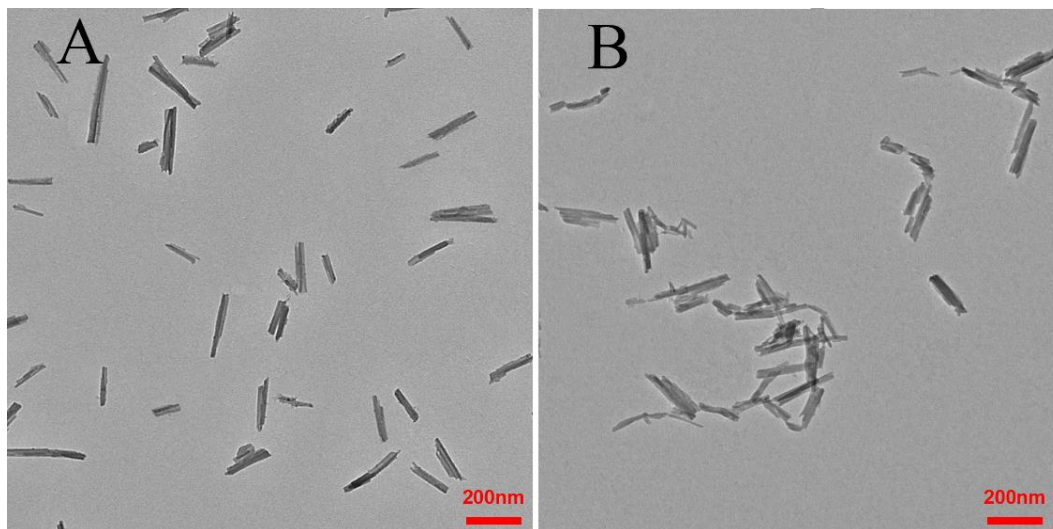

**Figure S2.** TEM images of Tb-MOF before (A) and after (B) reacted with ROS.

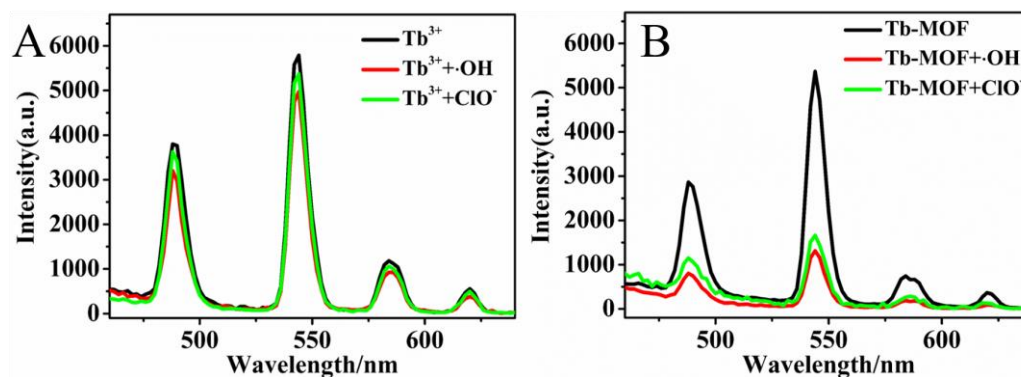

**Figure S3.** The luminescent spectra of  $\text{Tb}^{3+}$  (A) and Tb-MOF (B) without any ROS (black), with  $\cdot\text{OH}$  (red) and  $\text{ClO}^-$  (green), respectively. The concentrations of Tb in Tb-MOF and  $\text{Tb}^{3+}$  are  $1.5 \mu\text{M}$  and  $1.0 \text{mM}$ , respectively. The concentrations for OH and  $\text{ClO}^-$  are  $100 \mu\text{M}$ , respectively.

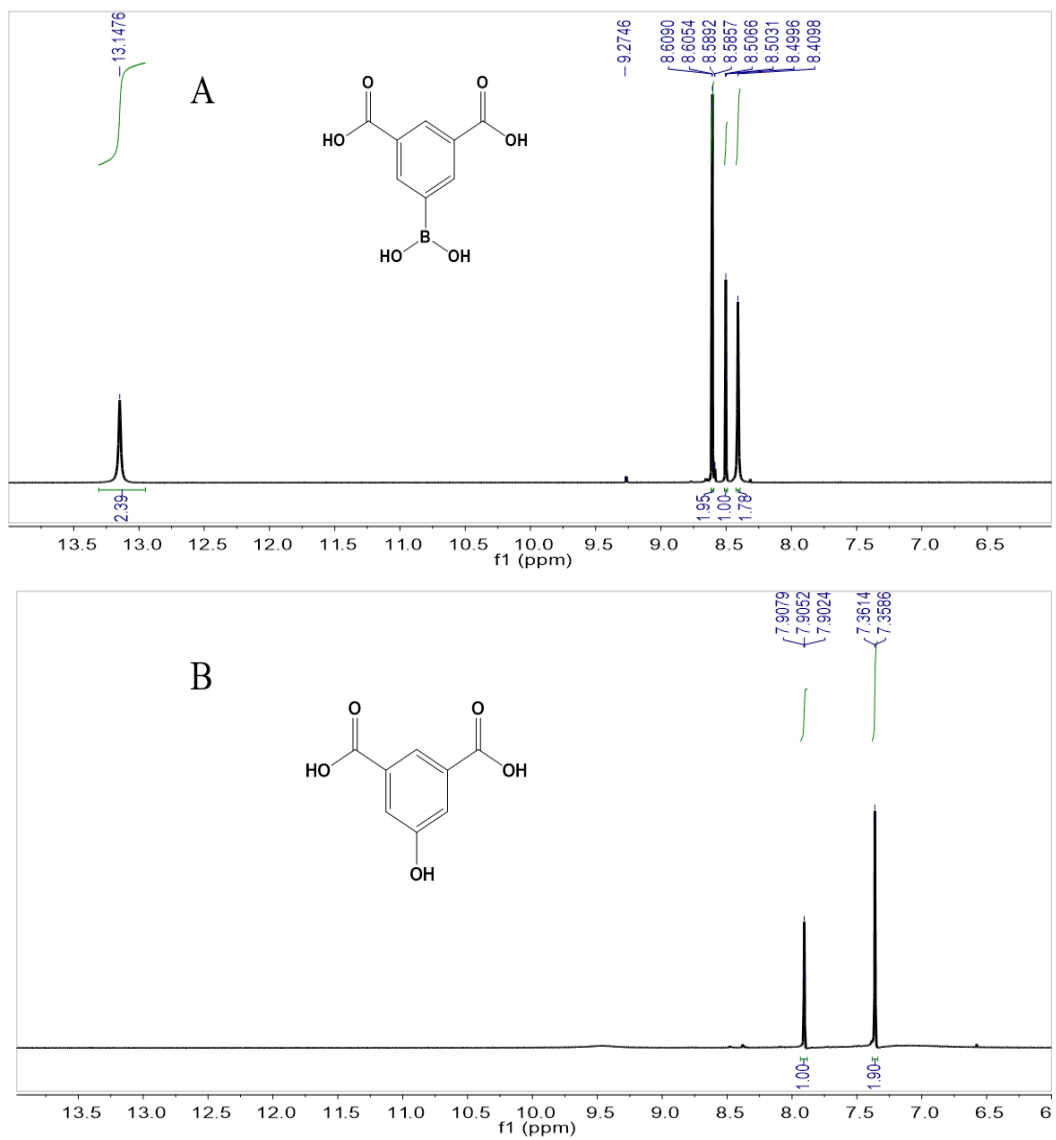

**Figure S4.**  $^1\text{H}$  NMR of (A) 5-bop in DMSO- $d_6$ :  $\delta$  13.15 (2H, s, COOH), 8.61 (2H, m), 8.51 (1H, t), 8.41 (2H, s). (B)  $\cdot$ OH treated 5-bop in DMSO- $d_6$ :  $\delta$  7.88 (1H, t), 7.34 (2H, d,  $J = 1$  Hz).

**Acquisition Parameter**

|             |          |                       |           |                  |           |
|-------------|----------|-----------------------|-----------|------------------|-----------|
| Source Type | ESI      | Ion Polarity          | Positive  | Set Nebulizer    | 1.5 Bar   |
| Focus       | Active   | Set Capillary         | 3700 V    | Set Dry Heater   | 180 °C    |
| Scan Begin  | 50 m/z   | Set End Plate Offset  | -500 V    | Set Dry Gas      | 6.0 l/min |
| Scan End    | 1200 m/z | Set Collision Cell RF | 500.0 Vpp | Set Divert Valve | Waste     |

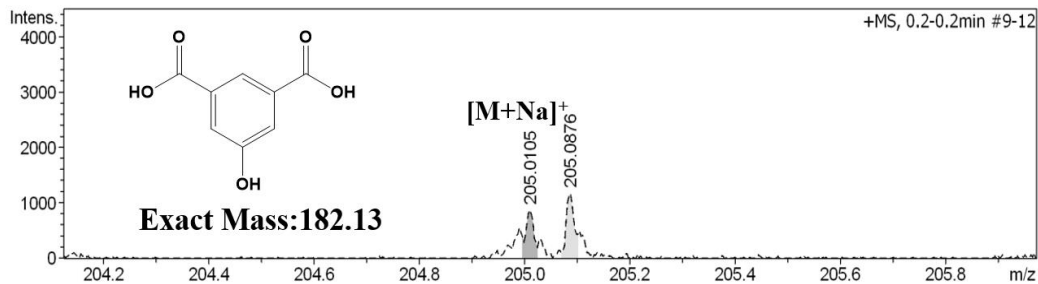

| # | m/z      | Res.  | S/N  | I    | I %   | FWHM   |
|---|----------|-------|------|------|-------|--------|
| 1 | 205.0105 | 12744 | 14.3 | 864  | 73.7  | 0.0161 |
| 2 | 205.0876 | 12396 | 19.5 | 1172 | 100.0 | 0.0165 |

| Meas. m/z | # | Ion Formula                                    | m/z      | err [ppm] | mSigma | Score | rdb    | e <sup>-</sup> Conf | N-Rule  |
|-----------|---|------------------------------------------------|----------|-----------|--------|-------|--------|---------------------|---------|
| 205.0105  | 1 | C <sub>8</sub> H <sub>6</sub> NaO <sub>5</sub> | 205.0107 | 1.3       | 52.1   | 1     | 100.00 | 5.5                 | even ok |

**Figure S5.** ESI-MS spectrum of  $\cdot\text{OH}$  treated Tb-MOF 8 mg Tb-MOF were firstly treated with  $\cdot\text{OH}$ , and then digested with 72  $\mu\text{L}$  (48% aqueous solution) HF and dissolved in 928  $\mu\text{L}$  MeOH.

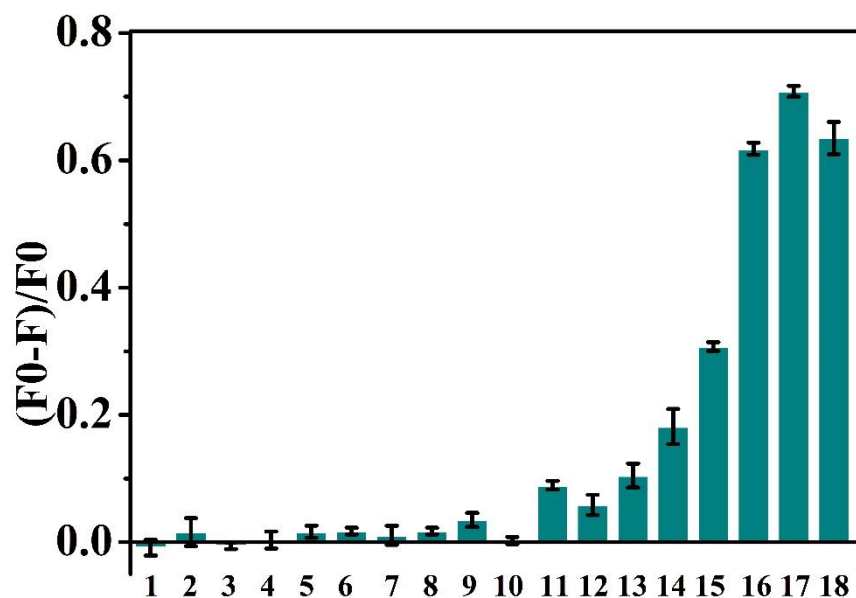

**Figure S6.** Luminescence intensities of Tb-MOF in presence of ROS (50  $\mu$ M) and common ions (50  $\mu$ M). (1) blank, (2) Na<sup>+</sup>, (3) K<sup>+</sup>, (4) Mg<sup>2+</sup>, (5) Ca<sup>2+</sup>, (6) Zn<sup>2+</sup>, (7) Cl<sup>-</sup>, (8) NO<sub>3</sub><sup>-</sup>, (9) NO<sub>2</sub><sup>-</sup>, (10) GSH, (11) Fe<sup>2+</sup>, (12) Fe<sup>3+</sup>, (13) H<sub>2</sub>O<sub>2</sub>, (14) O<sub>2</sub><sup>•-</sup>, (15) <sup>1</sup>O<sub>2</sub>, (16) ClO<sup>-</sup>, (17) ONOO<sup>-</sup>, (18) •OH.
